# Supplementary material for: Anxiolytic, Analgesic and Anti-Inflammatory Effects of Peptides Hmg 1b-2 and Hmg 1b-4 from the Sea Anemone Heteractis magnifica
Source: MDPI journal article supplement (doi:10.3390/toxins15050341), 2023-05-15
Supplement: s1 [file s1]

**Table S1.** Open field test. Parameters of motor and orienting-exploratory activity of mice treated with Hmg 1b-2 and Hmg 1b-4.

| Group                  | T (act), s         | T (pass), s       | T (c.z.), s        | T (b.z.), s         | V, m/s             | V(act), m/s | S, m              | S (act), m | N (c.z.)   | N (s.p.)   | N (racks)         | N (peeps)       | N (def)   | T (e.c.z.), s |
|------------------------|--------------------|-------------------|--------------------|---------------------|--------------------|-------------|-------------------|------------|------------|------------|-------------------|-----------------|-----------|---------------|
| Saline                 | 92.5 ± 22.1        | 80.5 ± 19.1       | 27.4 ± 14.0        | 145.8 ± 12.4        | 0.12 ± 0.04        | 0.23 ± 0.05 | 19.4 ± 5.2        | 21.8 ± 7.5 | 11.8 ± 5.5 | 11.4 ± 5.2 | 21.3 ± 9.1        | 5.8 ± 2.3       | 0.3 ± 0.8 | 11.4 ± 6.7    |
| Hmg 1b-2<br>1 mg/kg    | 109.1 ± 8.6        | 64.2 ± 7.2        | 34.8 ± 7.7         | 139.5 ± 7.7         | 0.19 ± 0.02<br>**  | 0.31 ± 0.05 | 33.2 ± 2.9<br>**  | 33.2 ± 3.0 | 20.3 ± 5.4 | 21 ± 5.0   | 15.8 ± 3.9        | 6.7 ± 2.5       | 0.2 ± 0.4 | 5.2 ± 1.9     |
| Hmg 1b-2<br>0.1 mg/kg  | 128.5 ± 10.7<br>** | 47.0 ± 11.3<br>** | 32.6 ± 10.0        | 143.80 ± 8.8        | 0.20 ± 0.02<br>*** | 0.29 ± 0.03 | 34.7 ± 4.0<br>*** | 36.7 ± 6.8 | 18.8 ± 5.1 | 19 ± 4.8   | 13.3 ± 3.9        | 9.3 ± 2.5<br>*  | 0         | 4.6 ± 1.3     |
| Hmg 1b-2<br>0.01 mg/kg | 126.3 ± 5.5<br>**  | 51.6 ± 4.7<br>**  | 25.8 ± 6.1         | 153.3 ± 5.5         | 0.21 ± 0.01<br>*** | 0.30 ± 0.01 | 37.9 ± 1.6<br>*** | 37.9 ± 6.4 | 17 ± 2.1   | 17.2 ± 2.0 | 15.3 ± 2.9        | 10.2 ± 0.7<br>* | 0         | 4.2 ± 1.8     |
| Hmg 1b-4<br>1 mg/kg    | 119.9 ± 10.4<br>*  | 56.8 ± 9.1<br>*   | 34.9 ± 5.9         | 143.8 ± 8.2         | 0.14 ± 0.01        | 0.21 ± 0.02 | 24.6 ± 2.3        | 24.6 ± 7.5 | 16.8 ± 2.7 | 16.9 ± 2.8 | 37.4 ± 3.9<br>*** | 9.0 ± 1.5<br>*  | 0.5 ± 0.7 | 6.4 ± 2.4     |
| Hmg 1b-4<br>0.1 mg/kg  | 122.3 ± 13.1<br>*  | 55.1 ± 11.1       | 53.8 ± 10.3<br>*** | 127.5 ± 10.0<br>*** | 0.14 ± 0.03        | 0.22 ± 0.03 | 24.2 ± 5.1        | 24.2 ± 5.1 | 21.2 ± 6.1 | 20.1 ± 6.4 | 37.0 ± 7.8<br>**  | 7.8 ± 2.1       | 0         | 6.1 ± 3.3     |
| Hmg 1b-4<br>0.01 mg/kg | 113.5 ± 9.5        | 64.2 ± 7.4        | 34.2 ± 2.8         | 145.4 ± 5.2         | 0.14 ± 0.02        | 0.22 ± 0.02 | 25.0 ± 1.8<br>**  | 25.0 ± 2.4 | 12 ± 0.8   | 13.3 ± 1.1 | 27.2 ± 1.9        | 8.0 ± 0.5       | 1.2 ± 0.2 | 6.5 ± 3.1     |

Where T (act)—activity time; T (pass)—passivity time; T (c.z.)—time spent on the central zone, s; T (b.z.)—staying on the border zone, s; V, m/s—average travel speed; V(act), m/s—average movement speed during activity; S, m—distance traveled; S (act), m—distance traveled during activity; N (c.z.)—number of visits to central zone; N (s.p.)—number of visits to side platform; N (racks)—vertical activity, the number of racks; N (peeps)—holes explored, the number of peeps into minks; N (def)—number of bowel movements; T (e.c.z.)—time of exit from the central zone, s. Results are presented as mean ± SD (n = 7–8). The significance of differences was estimated via one-way ANOVA followed by a Tukey's test versus saline group, with \*  $p < 0.05$ , \*\*  $p < 0.01$ , and \*\*\*  $p < 0.001$ .

**Table S2.** Elevated plus maze test. Parameters of anti-anxiety activity of mice treated with Hmg 1b-2 and Hmg 1b-4.

| Group                  | T (act), s   | T (pass), s    | N. entries |          |             | T., s           |             |             | V, m/s      | V(act), m/s | S, m       | S (act), m | N (racks) | N (sap)  | N (h-d)  | T (e.c.z.), |
|------------------------|--------------|----------------|------------|----------|-------------|-----------------|-------------|-------------|-------------|-------------|------------|------------|-----------|----------|----------|-------------|
|                        |              |                | Closed     | Open     | Central     | Closed          | Open        | Central     |             |             |            |            |           |          |          |             |
|                        |              |                | arms       | arms     | area        | arms            | arms        | area        |             |             |            |            |           |          |          |             |
| Saline                 | 153.3 ± 27.6 | 146.4 ± 27.6   | 25 ± 10.6  | 15 ± 7.7 | 23 ± 7.8    | 193.4 ± 25.3    | 62.9 ± 21.5 | 59.7 ± 17.5 | 0.13 ± 0.02 | 0.23 ± 0.02 | 40 ± 6.9   | 38 ± 7.4   | 40 ± 12.1 | 13 ± 3.1 | 12 ± 3.6 | 10.1 ± 9.3  |
| Hmg 1b-2<br>1 mg/kg    | 162.3 ± 21.8 | 137.6 ± 21.9   | 20 ± 7.3   | 22 ± 4.8 | 38 ± 8.5    | 151.1 ± 32.7 ** | 79.1 ± 23.3 | 93.5 ± 23.8 | 0.14 ± 0.02 | 0.25 ± 0.02 | 42.3 ± 5.8 | 40.5 ± 5.8 | 51 ± 6.3  | 13 ± 3.0 | 19 ± 3.6 | 3.3 ± 2.3   |
| Hmg 1b-2<br>0.1 mg/kg  | 172.4 ± 19.6 | 127.5 ± 19.8 * | 17 ± 2.7   | 18 ± 4.4 | 31 ± 5.0    | 152.1 ± 28      | 82.1 ± 27   | 68.7 ± 14.8 | 0.14 ± 0.01 | 0.24 ± 0.01 | 42.9 ± 4.3 | 41.1 ± 4.5 | 49 ± 14.4 | 15 ± 3.7 | 20 ± 5.9 | 4.6 ± 1.1   |
| Hmg 1b-2<br>0.01 mg/kg | 151.3 ± 7.4  | 148.5 ± 7.3    | 19 ± 5.3   | 23 ± 8.9 | 33 ± 11.3 * | 157.2 ± 35.7    | 60.9 ± 28.3 | 79.7 ± 25.3 | 0.13 ± 0.01 | 0.24 ± 0.02 | 37.8 ± 2.9 | 36.3 ± 2.8 | 43 ± 8.2  | 17 ± 4.5 | 12 ± 3.9 | 5.2 ± 4.6   |
| Hmg 1b-4<br>1 mg/kg    | 174 ± 17.9   | 125.7 ± 17.7 * | 19 ± 3.3   | 20 ± 2.5 | 29 ± 3.4    | 160.2 ± 17.2 *  | 89.6 ± 18.5 | 73.8 ± 14.6 | 0.14 ± 0.03 | 0.25 ± 0.04 | 43.1 ± 7.1 | 41.0 ± 7.5 | 45 ± 8.4  | 14 ± 1.8 | 18 ± 5.2 | 8 ± 6.5     |
| Hmg 1b-4<br>0.1 mg/kg  | 170.8 ± 16.1 | 128 ± 15.7     | 20 ± 6.6   | 22 ± 3.5 | 38 ± 8.4    | 169 ± 30.2      | 84.3 ± 28.7 | 78.7 ± 15.3 | 0.14 ± 0.02 | 0.27 ± 0.03 | 46.8 ± 6.1 | 45.1 ± 6.1 | 41 ± 4.8  | 17 ± 3.6 | 20 ± 8.3 | 8 ± 3.6     |
| Hmg 1b-4<br>0.01 mg/kg | 161.7 ± 10.6 | 137.7 ± 11.2   | 18 ± 4.8 * | 15 ± 3.3 | 36 ± 9.4    | 180.1 ± 18.7    | 69.3 ± 22.8 | 86.8 ± 15.9 | 0.15 ± 0.03 | 0.26 ± 0.02 | 44.3 ± 8.3 | 42.6 ± 8.0 | 34 ± 14.3 | 15 ± 2.3 | 19 ± 6.6 | 3 ± 1.5     |

Where T (act)—activity time; T (pass)—passivity time; N. entries—number of entries; T., s—time spent in closed, open arms and in central area; V, m/s—average travel speed; V(act), m/s—average movement speed during activity; S, m—distance traveled; S (act), m—distance traveled during activity; N (racks)—vertical activity, the number of racks; N (sap)—number of stretch-attend postures, when animal stretches to its full length mainly using the forepaws; N (h-d)—number of hanging-down reactions; T (e.c.z.)—time of exit from the central zone, s. Results are presented as mean ± SD (n = 7–8). The significance of differences was estimated via one-way ANOVA followed by a Tukey's test versus saline group, with \*  $p < 0.05$ , \*\*  $p < 0.01$ .
